1 **A chromatogram-simplified *Streptomyces albus* host for heterologous production of natural**  
2 **products**

3  
4 Asif Fazal<sup>1,2,3†</sup>, Divya Thankachan<sup>1,3†</sup>, Ellie Harris<sup>1,3</sup>, Ryan F. Seipke<sup>1,3\*</sup>

5  
6 <sup>1</sup>School of Molecular and Cellular Biology, <sup>2</sup>School of Chemistry, <sup>3</sup>Astbury Centre for Structural  
7 Molecular Biology, University of Leeds, Leeds, LS2 9JT, United Kingdom

8  
9 †Authors contributed equally to this work

10 \*Correspondence:

11 E-mail: [r.seipke@leeds.ac.uk](mailto:r.seipke@leeds.ac.uk)

12  
13 **Keywords:**

14 *Streptomyces*; *Streptomyces albus*; secondary metabolites; natural products; heterologous expression;

15 **Abstract**

16 Cloning natural product biosynthetic gene clusters from cultured or uncultured sources and  
17 their subsequent expression by genetically tractable heterologous hosts is an essential strategy for the  
18 elucidation and characterisation of novel microbial natural products. The availability of suitable  
19 expression hosts is a critical aspect of this workflow. In this work, we mutagenised five endogenous  
20 biosynthetic gene clusters from *Streptomyces albus* S4, which reduced the complexity of chemical  
21 extracts generated from the strain and eliminated antifungal and antibacterial bioactivity. We showed  
22 that the resulting quintuple mutant can express foreign BGCs by heterologously producing  
23 actinorhodin, cinnamycin and prunostatin. We envisage that our strain will be a useful addition to the  
24 growing suite of heterologous expression hosts available for exploring microbial secondary  
25 metabolism.

## 26 **Introduction**

27           The majority of clinically used antibiotics are derived from natural products produced by  
28 *Streptomyces* species and other closely related *Actinobacteria*, which were introduced into the clinic  
29 during a ‘golden era’ of antibiotic discovery spanning 1940-1960 [1]. The utility of these agents has  
30 been eroded over the last half-century due to misuse. As a consequence, there is now an urgent need  
31 to discover new antibiotics to treat bacterial infections, particularly those caused by drug-resistant  
32 ‘ESKAPE’ pathogens (*Enterococcus faecium*, *Staphylococcus aureus*, *Klebsiella pneumoniae*,  
33 *Acinetobacter baumannii*, *Pseudomonas aeruginosa*, and *Enterobacter species*) [2]. Growing concerns  
34 about resistance to antibacterial agents combined with the failure to find new leads from the screening  
35 of large libraries of synthetic compounds has led to a renewed interest in natural products discovery  
36 [3]. This renaissance has been fuelled to a large extent by the relatively inexpensive cost to sequence  
37 genomes of strains that produce promising bioactive small molecules. For example, there are  
38 currently >750 streptomycete genomes available in GenBank compared to four years ago when there  
39 were only ~150 [4]. Analysis of these genome sequences have illuminated the exciting prospect that  
40 the majority of microbial secondary metabolism has yet to be uncovered [5].

41           Further study of potentially interesting natural product biosynthetic pathways is often  
42 precluded by the poor growth characteristics of the strain and/or genetic intractability. Therefore, a  
43 heterologous expression strategy using a faster-growing and genetically tractable host is frequently  
44 adopted and indeed has become the method of choice for accessing new natural products and  
45 interrogating their biosynthesis. Technology for generating and screening large-insert genomic  
46 libraries (e.g. cosmid, BAC and PAC libraries) to obtain biosynthetic gene cluster (BGC) clones are  
47 well established [6,7]. These approaches are in the process of being superseded by recombination-  
48 based cloning methods for targeted ‘capture’ of DNA both from isogenic strains [8] and  
49 environmental DNA [9] as well as the ability to assemble natural/synthetic DNA *in vivo* and *in vitro*  
50 (recently reviewed by [10-12]).

51           Although fastidiously growing bacterial species, such as *Escherichia coli*, have been used for

52 some heterologous expression studies, its use has thus far been rather limited because of poor  
53 expression of native promoter systems, but in some cases can be overcome by engineered promoter  
54 swaps either with the T7 promoter or those recognised by alternative RNA polymerase sigma factors  
55 [13,14]. As a consequence, streptomycetes and other related genera such as *Saccharopolyspora* and  
56 *Salinispora* are the go-to platform for heterologous expression, because they are metabolically robust  
57 with respect to availability of precursors and cofactors, and native promoter elements are more likely  
58 to be functional compared to alternative hosts [11,15]. Unsurprisingly, well studied species of  
59 *Streptomyces* such as *S. avermitilis*, *S. coelicolor*, *S. lividans* and *S. venezuelae* are commonly used  
60 for heterologous expression studies [16,17]. Several of the aforementioned species have been  
61 engineered for improved heterologous expression, principally via the mutation of endogenous BGCs  
62 [18-21].

63         Despite the utility of these strains, *S. albus* is still frequently used as a heterologous expression  
64 host. *S. albus* strains are seemingly distributed worldwide and encode a diverse range of natural  
65 products produced by a variety of biosynthetic systems [4,22]. They are genetically tractable and  
66 grow relatively quickly using conventional growth media and methodology. *S. albus* J1074 in  
67 particular has served as a workhorse for heterologous production of natural products over the last two  
68 decades and recently a strain with reduced biosynthetic pathway content was generated [23].  
69 Relatively recently, we isolated a streptomycete from leafcutting ants that is closely related to *S. albus*  
70 J1074, which we designated *Streptomyces albus* S4 [24]. J1074 and S4 are phylogenetically closely  
71 related strains differing in only 12 nucleotide positions across >12 kb of DNA sequence representing  
72 29 conserved single-copy conserved phylogenetic markers [22]. The two strains share ~80% of their  
73 BGCs, but S4 encodes a larger and more diverse complement of secondary metabolites [4]. The  
74 genetic tractability, robust and fastidious growth and ability to produce diverse secondary metabolites  
75 motivated us to modify this strain for easier detection of heterologously produced natural products.

76         There were two major aims of this work, the first aim was to construct a strain that when  
77 cultivated under routine conditions was unable to produce antifungal or antibacterial compounds, and

78 the second aim was to construct a strain from which chemical extracts with reduced complexity could  
79 be generated. Here we describe the construction of a chromatogram-simplified strain of *S. albus* S4  
80 where five BGCs have been mutated and we demonstrate its ability to heterologously produce  
81 actinorhodin, cinnamycin and prunostatin.

## 82 **Results and Discussion**

83 **Construction of *Streptomyces albus* S4  $\Delta$ 5.** The *S. albus* S4 genome was previously  
84 sequenced [25,26] and it harbours at least 28 putative natural product biosynthetic gene clusters  
85 (BGCs) according to antiSMASH 3.0 (Fig. 1A, [27]). Chemical extracts prepared from *S. albus* S4  
86 cultivated under a variety of culture conditions are dominated by antimycins and candicidin [24,26].  
87 Therefore, abolishing production of these compounds was a top priority in our mutagenesis strategy.  
88 With the longer-term goal of ultimately developing an *S. albus* host as a platform to screen  
89 uncharacterised BGC clones for antibacterial activity, we also targeted the albaflavenone, surugamide  
90 and fredericamycin BGCs because these compounds have been reported to have antibacterial  
91 properties [28-30]. We mutated these five BGCs using conventional marker exchange mutagenesis  
92 (candicidin), PCR-targeted recombineering (antimycin) and CRISPR/Cas9 genome editing  
93 (albaflavenone, surugamide and fredericamycin). The workflow for this strategy is presented in Fig.  
94 1B and is described in the materials and methods section. The final mutant strain, which we  
95 designated *S. albus* S4  $\Delta$ 5, harbours a complete pathway deletion in the antimycin BGC, and deletions  
96 in key biosynthetic genes for the other four targeted BGCs. Deletions were first verified by PCR and  
97 the overall integrity of the *S. albus* S4  $\Delta$ 5 strain was verified by genome sequencing using the Illumina  
98 MiSeq platform. The expected mutations were verified by mapping sequence reads to the *S. albus* S4  
99 wild-type genome sequence [25]. A schematic representation of the relevant areas of the mapping are  
100 displayed in Fig. 1B and Figs. S1-S5.

101 **Sporulation, biomass and bioactivity of  $\Delta$ 5.** In order to ensure that serial passage (e.g. to  
102 cure plasmids with temperature-sensitive replicons such as that employed by pCRISPomyces-2) did  
103 not lead to mutation(s) adversely impacting sporulation and/or growth of  $\Delta$ 5, we assessed sporulation  
104 on MS agar and analysed its ability to produce biomass when cultivated using TSB. The  $\Delta$ 5 mutant  
105 strain sporulated equally as well as the wild-type strain, which indicated the absence of mutations  
106 deleterious to a normal developmental cycle and it also produced a comparable abundance of  
107 dispersed biomass to that of its parent (Fig. 2AB). Next, we analysed the bioactivity of ethyl acetate

108 chemical extracts prepared from culture supernatants of *S. albus* S4 wild-type or  $\Delta 5$  cultivated in  
109 liquid MS against *Candida albicans* and *Micrococcus luteus*, which revealed that extracts from the  
110  $\Delta 5$  strain were not bioactive (Fig. 2CD).

111 **Chromatographic profile of  $\Delta 5$ .** Chemical extracts generated from *S. albus* S4 wild-type are  
112 complex and chromatographs are dominated by candicidins and antimycins when using a standard  
113 aqueous/organic phase gradient of 5-95% acetonitrile or methanol [26,31]. In order to assess to what  
114 extent this complexity was reduced in extracts generated from the  $\Delta 5$  mutant, we cultivated S4 wild-  
115 type and  $\Delta 5$  using liquid MS and performed an ethyl acetate extraction of the resulting clarified  
116 culture supernatant. Next, extracts were analysed by HPLC, which as anticipated, revealed that the  
117 extracts generated from the  $\Delta 5$  were far less complex than those generated from the wild-type strain  
118 (Fig. 3). The cleaner chromatographic background of the *S. albus* S4  $\Delta 5$  strain will simplify detection  
119 of heterologously produced natural products by HPLC or LC-MS and ease their subsequent  
120 purification.

121 **Heterologous production of actinorhodin, cinnamycin and prunostatin.** As a proof of  
122 principle to demonstrate that S4  $\Delta 5$  can produce natural products encoded by other taxa, we  
123 introduced three foreign BGCs: the actinorhodin BGC from *S. coelicolor* A3(2), the cinnamycin BGC  
124 from *S. cinnamoneus* DSM 40646 and the neoantimycin/prunostatin BGC from *S. orinoci* B-NRRL  
125 3379 [20,32,33]. These BGCs were selected in part due to accessibility, but also because they  
126 comprised three different biosynthetic systems. Actinorhodin is a type II polyketide antibacterial,  
127 cinnamycin is a ribosomally synthesised and post-translationally modified peptide antibacterial and  
128 neoantimycin/prunostatin is a hybrid non-ribosomal peptide / polyketide anti-cancer compound.  
129 Recombinant strains harbouring these BGCs were generated and cultivated using MS agar or TSB  
130 for seven days. Next, chemical extracts were prepared from the  $\Delta 5$ /Act,  $\Delta 5$ /Cin,  $\Delta 5$ /Prun strains and  
131 their parent and subsequently analysed by LC-HRMS (Fig. 4). Inspection of the resulting data  
132 revealed the presence of compounds consistent with  $\gamma$ -actinorhodin, cinnamycin and prunostatin in  
133 chemical extracts prepared from  $\Delta 5$ /Act,  $\Delta 5$ /Cin,  $\Delta 5$ /Prun, respectively and importantly, their absence

134 from the  $\Delta 5$  parental strain. These data indicate that *S. albus* S4  $\Delta 5$  is capable of heterologous  
135 expressing foreign BGCs from classes of varying biosynthetic logic.

136 **Summary and concluding perspectives.** We have constructed a strain of *S. albus* S4 in  
137 which the antimycin, candicidin, albaflavenone, surugamide and fredericamycin BGCs have been  
138 mutated. We showed that the resulting strain, *S. albus* S4  $\Delta 5$ , possessed a simpler chromatographic  
139 profile and did not possess antibacterial or antifungal activity using the growth media tested and also  
140 demonstrated that it could serve as a surrogate host for the production of actinorhodin, cinnamycin  
141 and prunostatin. Interestingly, during the course of our study we also tried to heterologously produce  
142 bicyclomycin and methylenomycin, but were unable to detect either metabolite by LC-HRMS. The  
143 unsuccessful attempt to heterologously produce bicyclomycin and methylenomycin underscores a  
144 key consideration for heterologous expression studies – host selection. For instance, *S. coelicolor* is  
145 a native producer of methylenomycin and was recently used as a host for bicyclomycin production  
146 [34], however it will not produce neoantimycin/prunostatin unless the biosynthetic genes are  
147 artificially expressed from constitutive promoters [33]. Indeed, there is no panacea in terms of a  
148 heterologous expression host, each one being somewhat enigmatic with peculiarities rooted in  
149 primary metabolism (i.e. precursor and co-factor supply) or promoter recognition elements. It is  
150 therefore advantageous and indeed wise when pursuing heterologous expression of a BGC to cast a  
151 wide net and screen multiple hosts. The *S. albus* S4  $\Delta 5$  strain constructed here will hopefully be a  
152 useful tool to that end.



## 153 **Materials and methods**

154 **Growth media, strains and reagents.** *Escherichia coli* strains were cultivated using Lennox  
155 agar (LA) or broth (LB) and *Streptomyces* strains were cultured using mannitol-soya flour (MS) agar,  
156 tryptic soy broth (TSB) or agar (TSA) [35]. Culture media was supplemented with antibiotics as  
157 required at the following concentrations: apramycin (50 µg/ml), carbenicillin (100 µg/ml),  
158 hygromycin (75 µg/ml), kanamycin (50 µg/ml), nalidixic acid (25 µg/ml). Enzymes were purchased  
159 from New England Biolabs and oligonucleotides were purchased from Integrated DNA  
160 Technologies. The bacterial strains, cosmids and plasmids used in this study are described in Table  
161 S1 and the oligonucleotides are described in Table S2.

162 **Mutagenesis of biosynthetic gene clusters.** In order to delete the *ant* BGC, the *antF* gene on  
163 S4 Cosmid213 [31] was replaced with the apramycin resistance cassette from pIJ773 using PCR  
164 targeted mutagenesis as previously described [36]. The mutated cosmid was used to generate an  
165 apramycin resistant *S. albus* S4  $\Delta antF$  strain. Next, *antABCDEFGHIJKLMNO* on Cosmid213 were  
166 replaced with the apramycin resistance cassette in the same manner as above and subsequently  
167 removed by the Flp recombinase, after which the *bla* gene was replaced with the hygromycin  
168 resistance cassette also harbouring an *oriT* from pIJ10701 as previously described [36] to result in  
169 Cosmid213  $\Delta antFLP$  B2H. This cosmid was mobilised to *S. albus* S4  $\Delta antF$  and a single hygromycin  
170 resistant transconjugant was selected and subsequently passaged twice in the absence of selection  
171 prior to replica plate identification of an apramycin sensitive and hygromycin sensitive isolate that  
172 we named *S. albus* S4  $\Delta 1$ . The integrity of this strain was confirmed by PCR using primers RFS236  
173 and RFS237.

174 The *can* BGC was mutated using the previously constructed *fscC* (*STRS4\_02234*) deletion  
175 plasmid, pKC1132-UpDn [26]. pKC1132-UpDn was mobilised to *S. albus* S4  $\Delta 1$  strain and a single  
176 apramycin resistant transconjugant was selected and passaged as above until an apramycin-sensitive  
177 isolate was identified, which we named *S. albus* S4  $\Delta 2$ .

178 The surugamide, fredericamycin and albaflavenone BGCs were mutated using the  
179 pCRISPomyces-2 system describe previously [37]. First, a single-guide RNA protospacer was  
180 generated by annealing oligonucleotides EH\_S9 and EH\_S10 (surugamide), EH\_S3 and EH\_S4  
181 (albaflavenone) and EH\_S7 and EH\_S8 (fredericamycin); the resulting DNA fragments were cloned  
182 into the BbsI site of pCRISPomyces-2 by Golden Gate Assembly. Second, two overlapping DNA  
183 fragments representing a homology-directed repair template were generated by PCR using the  
184 primers listed in Table S2. The overlapping PCR products were subsequently cloned into the XbaI  
185 site of protospacer-containing pCRISPomyces-2 plasmid using the NEBuilder HiFi DNA assembly  
186 kit. The resulting CRISPR/Cas9 editing plasmids, pCRISPomyces-2-sur, pCRISPomyces-2-alb,  
187 pCRISPomyces-2-fdm were sequentially mobilised to *Streptomyces* and cured as described  
188 previously [38] and schematically illustrated in Figure S1 to result in the quintuple mutant strain  
189 described in this study, *S. albus* S4  $\Delta$ 5.

190 **Genome sequencing and bioinformatics analysis.** *S. albus* S4  $\Delta$ 5 chromosomal DNA was  
191 sequenced by Microbes NG (Birmingham, UK) using the Illumina MiSeq platform. This resulted in  
192 the generation of 2,859,380 paired-end reads that were 250 nt in length. 2,809,652 of these reads  
193 were mapped the *S. albus* S4 wild-type chromosome (GenBank accession CADY00000000.1 [25])  
194 using the Geneious assembler (version R8.1.19). Schematic representations of relevant loci depicted  
195 in Figs. S2-S6 were generated using Geneious version R8.1.19.

196 **Bioactivity assays.** Indicator organism was cultivated overnight in LB at 37 °C. Overnight  
197 culture was diluted to an OD<sub>625nm</sub> of 0.08 in LB and spread onto an LB agar plate using a rotary  
198 platform. Sterile paper discs (6 mm diameter) holding 60  $\mu$ l of chemical extract were placed atop  
199 seeded indicator plates, which were subsequently incubated at 37 °C (*Micrococcus luteus*) or room  
200 temperature (*Candida albicans*) and visualized the following day.

201 **HPLC analysis.** *S. albus* strains were cultivated in liquid MS (50 ml) whilst shaking at 220  
202 rpm in a 250 ml flask at 30 °C for 7 days. Bacterial cells and solid matter from the culture medium  
203 were removed by centrifugation and 45 ml of supernatant were extracted with 90 ml of ethyl acetate.

204 The extract was evaporated to dryness under reduced pressure and resuspended in 100% methanol  
205 (500  $\mu$ l). The methanolic extract was centrifuged for 10 minutes at 16,000 x *g* to remove insoluble  
206 material prior to sample injection (10  $\mu$ l) into a Dionex HPLC instrument. Compounds were separated  
207 on a Phenomenex Luna C18 column (5  $\mu$ m, 150 x 4.6 mm) using the following gradient (solvent A:  
208 5% acetonitrile, 0.1% formic acid, solvent B: 95% acetonitrile, 0.05% formic acid, flow rate 1  
209 ml/min): 0-40 min, 0-100% B; 40-43 min, 100% B; 43-51 min 0% B.

210 **LCMS analysis.** Clones of the actinorhodin, cinnamycin and neoantimycin BGCs were  
211 introduced into *S. albus*  $\Delta$ 5 by intergeneric conjugation from *Escherichia coli* ET12567/pUZ8002.  
212 Apramycin resistant transconjugants were verified to have received BGCs by PCR. For the  
213 production of actinorhodin and prunostatin, MS agar plates were seeded with either  $\Delta$ 5 or  $\Delta$ 5/Act or  
214  $\Delta$ 5/Prun and cultivated for 7 days at 30 °C. The agar was then cut into small rectangular pieces and  
215 placed into an Erlenmeyer flask and metabolites extracted with ethyl acetate (100 ml) for 24 hrs. The  
216 ethyl acetate extract was decanted and concentrated *in vacuo* and the dried residue was resuspended  
217 in 100% methanol (500  $\mu$ l). For the production of cinnamycin, *S. albus* S4  $\Delta$ 5 and  $\Delta$ 5/Cin strains  
218 were cultured in 50 ml TSB for 7 days at 30 °C. The resulting mycelia was collected by centrifugation  
219 and extracted with 100% methanol (45 ml) for 4 hours. The methanolic extracts were evaporated to  
220 dryness *in vacuo* and resuspended in 100% methanol (500  $\mu$ l) as above. Equal volumes of methanolic  
221 extract for three independently cultivated replicates of  $\Delta$ 5,  $\Delta$ 5/Act,  $\Delta$ 5/Cin,  $\Delta$ 5/Prun were pooled and  
222 centrifuged for 10 minutes at 16,000 x *g* to remove insoluble material prior to analysis by high  
223 resolution electrospray ionization liquid chromatography mass spectrometry (LC-HRMS). Only the  
224 supernatant (2  $\mu$ l) was injected into a Bruker MaXis Impact TOF mass spectrometer and equipped  
225 with a Dionex Ultimate 3000 HPLC exactly as previously described [13].

226 **Acknowledgements.** We are grateful to Iain Manfield for assistance with HPLC experiments,  
227 which were conducted in the University of Leeds Biomolecular Interactions Facility. We thank David  
228 Widdick and Mervyn Bibb for providing the cinnamycin and actinorhodin BGC clones, Andy Truman  
229 for providing the bicyclomycin BGC clone and Christophe Corre for providing the methylenomycin

230 BGC clone. This work was supported by Biotechnology and Biological Sciences Research Council  
231 responsive mode grant BB/N007980/1 awarded to RFS. AF and DT were funded by PhD studentships  
232 funded by the University of Leeds.

233 **Conflicts of interest.** The authors declare that there are no conflicts of interest and that the  
234 funders had no role in study design, data collection and interpretation, or the decision to submit the  
235 work for publication.

236 **Ethical statement.** No human or animal experiments were conducted during his study.

237 **References**

238

239 **Figures and legends**

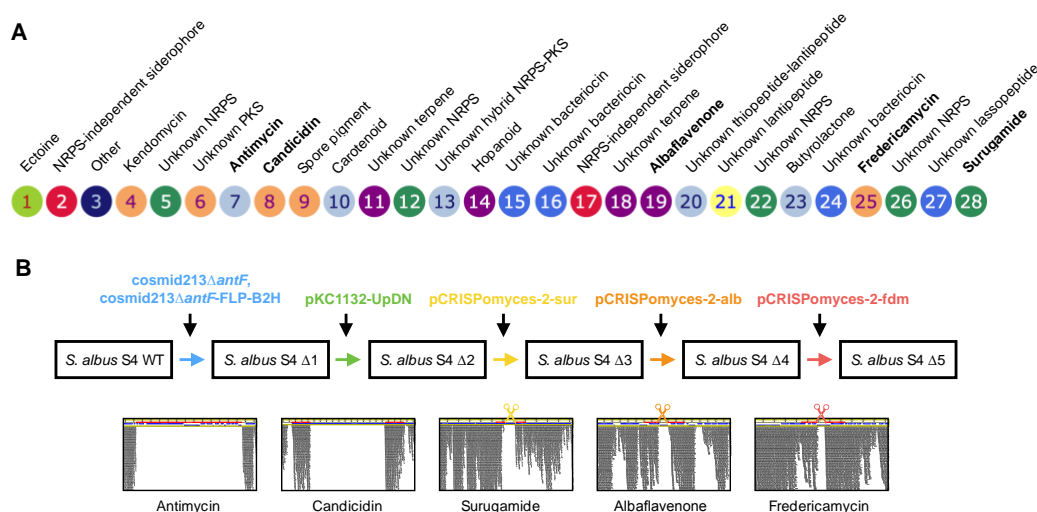

240

241 **Fig 1.** *Streptomyces albus* S4 biosynthetic gene clusters (BGCs) and their mutation. (A)  
 242 Diagrammatic representation of putative BGCs identified by antiSMASH 3.0. The BGCs are  
 243 numbered and the experimentally determined or bioinformatically deduced products are listed where  
 244 known. BGCs targeted for mutagenesis in this study are indicated by bold text. (B) Schematic of the  
 245 workflow used to create *S. albus* S4 Δ5. Knockout constructs are colour coded according to their  
 246 targeted mutation and plasmid and strain designations are described in Table S1. The bottom panel  
 247 depicts Illumina MiSeq reads mapped to the relevant locus of the *S. albus* S4 Δ5 genome illustrating  
 248 that the desired mutation was achieved. The scissors indicate cleavage by the Cas9 nuclease. Full  
 249 size versions of these images are shown in Figures S1-S5.

250

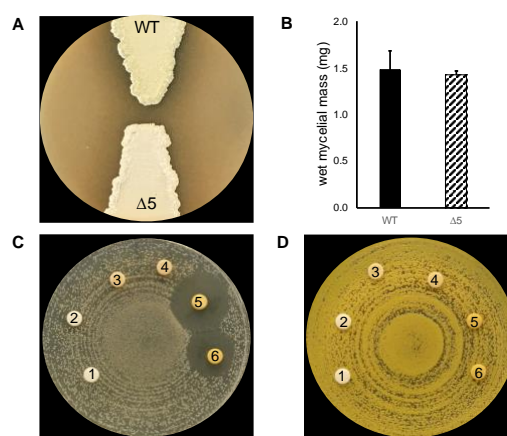

251

252 **Fig. 2.** *S. albus* S4 Δ5 sporulates normally and produces biomass equal to that of the WT strain during  
 253 growth in liquid media. (A) Sporulation of *S. albus* strains after growth on MS agar for 7 days. (B)  
 254 Wet cell mass of *S. albus* strains originating from TSB cultures. The values reported are the means  
 255 for a 20 ml sample of culture and the vertical bars represent the standard deviation (n = 3). The results  
 256 are not statistically significantly different in a Student's *t* test with a *P* value >0.60. Bioactivity of  
 257 ethyl acetate chemical extracts generated from *S. albus* strains cultivated in liquid MS against (C)  
 258 *Candida albicans* and (D) *Micrococcus luteus*. The discs on each plate are numbered and are as  
 259 follows: 1, methanol; 2, extract from MS media; 3 and 4, *S. albus* Δ5 extract; 5 and 6, *S. albus* S4  
 260 WT extract. A zone of inhibited growth is apparent only for the wild-type extract against *C. albicans*.

261

262

263

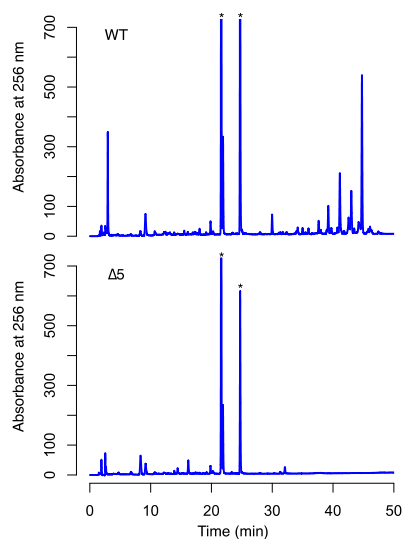

264

265 **Fig. 3.** HPLC analysis of ethyl acetate extracts prepared from *S. albus* S4 WT and  $\Delta 5$  strains. The  
266 HPLC chromatogram originating from the  $\Delta 5$  strain is simpler in composition compared to that of  
267 the WT strain. The asterisks indicate HPLC peaks that are not fully visible in this image, but can be  
268 seen in Fig. S6.

269

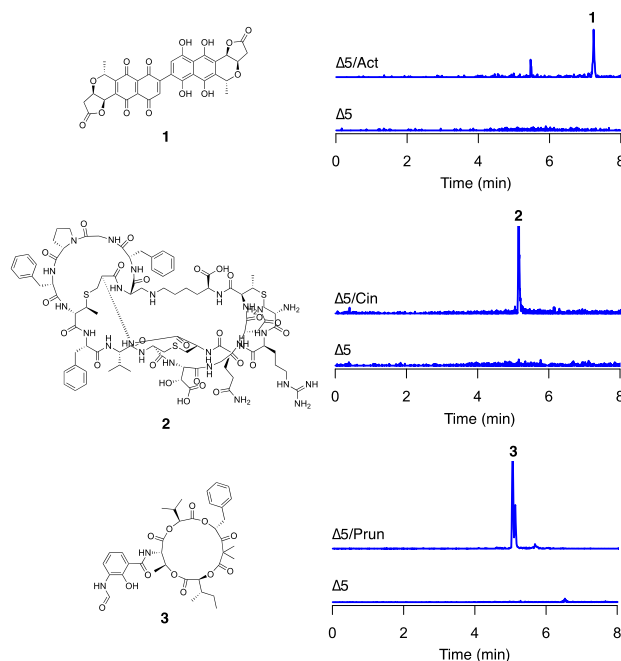

270

271

272 **Fig. 4.** Heterologous production of  $\gamma$ -actinorhodin (**1**), cinnamycin (**2**) and prunustatin (**3**) by *S. albus*  
273 S4  $\Delta 5$ . LC-HRMS analysis of chemical extracts prepared from the indicated strains. The  $m/z$  values  
274 corresponding to the  $[M+2H]^{2+}$  ions derived from  $\gamma$ -actinorhodin ( $C_{32}H_{22}O_{14}$ ), cinnamycin  
275 ( $C_{89}H_{125}N_{25}O_{25}S_3$ ), and prunustatin ( $C_{36}H_{44}N_2O_{12}$ ) are shown. The intensity scale for extracted ion  
276 chromatograms is  $1 \times 10^4$  for  $\gamma$ -actinorhodin and cinnamycin, and  $1 \times 10^5$  for prunustatin.

## 277 References

- 278 1. **Katz L, Baltz RH.** Natural product discovery: past, present, and future. *J Ind Microbiol*  
279 *Biotechnol* 2016;43:155–176.
- 280 2. **Boucher HW, Talbot GH, Bradley JS, Edwards JE, Gilbert D, Rice LB, et al.** Bad  
281 Bugs, No Drugs: No ESKAPE! An Update from the Infectious Diseases Society of  
282 America. *Clin Infect Dis* 2009;48: 1–12.
- 283 3. **Payne DJ, Gwynn MN, Holmes DJ, Pompliano DL.** Drugs for bad bugs: confronting  
284 the challenges of antibacterial discovery. *Nat Rev Drug Discov* 2006;6: 29–40.
- 285 4. **Seipke RF.** Strain-level diversity of secondary metabolism in *Streptomyces albus*. *PLoS*  
286 *ONE*. 2015;10:e0116457–14.
- 287 5. **Doroghazi JR, Albright JC, Goering AW, Haines RR, Tchalukov KA, Labeda DP,**  
288 **et al.** A roadmap for natural product discovery based on large-scale genomics and  
289 metabolomics. *Nat Chem Biol* 2014;10:963–968.
- 290 6. **Jones AC, Gust B, Kulik A, Heide L, Buttner MJ, Bibb MJ.** Phage P1-derived  
291 artificial chromosomes facilitate heterologous expression of the FK506 gene cluster.  
292 *PLoS ONE* 2013;8:e69319–9.
- 293 7. **Qin Z, Munnoch JT, Devine R, Holmes NA, Seipke RF, Wilkinson KA, et al.**  
294 Formicamycins, antibacterial polyketides produced by *Streptomyces formicae* isolated  
295 from African *Tetraponera* plant-ants. *Chem Sci* 2017;8:3218–3227.
- 296 8. **Yamanaka K, Reynolds KA, Kersten RD, Ryan KS, Gonzalez DJ, Nizet V, et al.**  
297 Direct cloning and refactoring of a silent lipopeptide biosynthetic gene cluster yields the  
298 antibiotic taromycin A. *Proc Natl Acad Sci USA* 2014;111:1957–1962.
- 299 9. **Hover BM, Kim S-H, Katz M, Charlop-Powers Z, Owen JG, Ternei MA, et al.**  
300 Culture-independent discovery of the malacidins as calcium-dependent antibiotics with  
301 activity against multidrug-resistant Gram-positive pathogens. *Nat Microbiol* 2018;3:1–  
302 10.
- 303 10. **Luo Y, Enghiad B, Zhao H.** New tools for reconstruction and heterologous expression  
304 of natural product biosynthetic gene clusters. *Nat Prod Rep* 2016;33:174–182.
- 305 11. **Zhang MM, Wang Y, Ang EL, Zhao H.** Engineering microbial hosts for production of  
306 bacterial natural products. *Nat Prod Rep* 2016;00:1–25.
- 307 12. **Kim E, Moore BS, Yoon YJ.** Reinvigorating natural product combinatorial  
308 biosynthesis with synthetic biology. *Nat Chem Biol* 2015;11:649–659.
- 309 13. **Liu J, Zhu X, Seipke RF, Zhang W.** Biosynthesis of antimycins with a reconstituted  
310 3-formamidosalicylate pharmacophore in *Escherichia coli*. *ACS Synth Biol* 2015;4:559–  
311 565.
- 312 14. **Stevens DC, Conway KR, Pearce N, Villegas-Peñaranda LR, Garza AG, Boddy**  
313 **CN.** Alternative sigma factor over-expression enables heterologous expression of a type  
314 II polyketide biosynthetic pathway in *Escherichia coli*. *PLoS ONE* 2013;8:e64858.

- 315 15. **Schniete JK, Cruz-Morales P, Selem Mojica N, Fernández-Martínez LT, Hunter**  
316 **IS, Barona-Gómez F, et al.** Expanding primary metabolism helps generate the  
317 metabolic robustness to facilitate antibiotic biosynthesis in *Streptomyces*. *mBio* 2018;9:  
318 e02283–17.
- 319 16. **Huo L, Hug JJ, Fu C, Bian X, Zhang Y, Müller R.** Heterologous expression of  
320 bacterial natural product biosynthetic pathways. *Nat Prod Rep* 2019;4:206–25.
- 321 17. **Nepal KK, Wang G.** Streptomycetes: surrogate hosts for the genetic manipulation of  
322 biosynthetic gene clusters and production of natural products. *Biotechnol Adv.* 2019;37:  
323 1–20.
- 324 18. **Komatsu M, Uchiyama T, Omura S, Cane DE, Ikeda H.** Genome-minimized  
325 *Streptomyces* host for the heterologous expression of secondary metabolism. *Proc Natl*  
326 *Acad Sci USA* 2010;107:2646–2651.
- 327 19. **Komatsu M, Komatsu K, Koiwai H, Yamada Y, Kozone I, Izumikawa M, et al.**  
328 Engineered *Streptomyces avermitilis* host for heterologous expression of biosynthetic  
329 gene cluster for secondary metabolites. *ACS Synth Biol* 2013;2:384–396.
- 330 20. **Gomez-Escribano JP, Bibb MJ.** Engineering *Streptomyces coelicolor* for heterologous  
331 expression of secondary metabolite gene clusters. *Microb Biotechnol* 2011;4:207–215.
- 332 21. **Thanapipatsiri A, Claesen J, Gomez-Escribano JP, Bibb M, Thamchaipenet A.** A  
333 *Streptomyces coelicolor* host for the heterologous expression of Type III polyketide  
334 synthase genes. *Microb Cell Fact* 2015;14:1–11.
- 335 22. **Joynt R, Seipke RF.** A phylogenetic and evolutionary analysis of antimycin  
336 biosynthesis. *Microbiology* 2018;164:28–39.
- 337 23. **Myronovskyi M, Rosenkränzer B, Nadmid S, Pujic P, Normand P, Luzhetskyy A.**  
338 Generation of a cluster-free *Streptomyces albus* chassis strains for improved  
339 heterologous expression of secondary metabolite clusters. *Metab Eng* 2018;49:316–324.
- 340 24. **Barke J, Seipke RF, Grünschow S, Heavens D, Drou N, Bibb MJ, et al.** A mixed  
341 community of actinomycetes produce multiple antibiotics for the fungus farming ant  
342 *Acromyrmex octospinosus*. *BMC Biol* 2010;8:109.
- 343 25. **Seipke RF, Crossman L, Drou N, Heavens D, Bibb MJ, Caccamo M, et al.** Draft  
344 genome sequence of *Streptomyces* strain S4, a symbiont of the leaf-cutting ant  
345 *Acromyrmex octospinosus*. *J Bacteriol* 2011;193:4270–4271.
- 346 26. **Seipke RF, Barke J, Brearley C, Hill L, Yu DW, Goss RJM, et al.** A single  
347 *Streptomyces* symbiont makes multiple antifungals to support the fungus farming ant  
348 *Acromyrmex octospinosus*. *PLoS ONE* 2011;6:e22028–8.
- 349 27. **Weber T, Blin K, Duddela S, Krug D, Kim HU, Bruccoleri R, et al.** antiSMASH  
350 3.0—a comprehensive resource for the genome mining of biosynthetic gene clusters.  
351 *Nucleic Acids Res* 2015;43:W237–W243.
- 352 28. **Gürtler H, Pedersen R, Anthoni U, Christophersen C, Nielsen PH, Wellington EM,**  
353 **et al.** Albaflavenone, a sesquiterpene ketone with a zizaene skeleton produced by a  
354 streptomycete with a new rope morphology. *J Antibiot* 1994;47:434–439.



- 355 29. **Wang X, Shaaban KA, Elshahawi SI, Ponomareva LV, Sunkara M, Copley GC, et**  
356 **al.** Mullinamides A and B, new cyclopeptides produced by the Ruth Mullins coal mine  
357 fire isolate *Streptomyces* sp. RM-27-46. *J Antibiot* 2014;67:571–575.
- 358 30. **Warnick-Pickle DJ, Byrne KM, Pandey RC, White RJ.** Fredericamycin A, a new  
359 antitumor antibiotic. II. Biological properties. *J Antibiot* 1981;34:1402–1407.
- 360 31. **Seipke RF, Patrick E, Hutchings MI.** Regulation of antimycin biosynthesis by the  
361 orphan ECF RNA polymerase sigma factor  $\sigma^{\text{AntA}}$ . *PeerJ* 2014;2:e253.
- 362 32. **Widdick DA, Dodd HM, Barraille P, White J, Stein TH, Chater KF, et al.** Cloning  
363 and engineering of the cinnamycin biosynthetic gene cluster from *Streptomyces*  
364 *cinnamoneus cinnamoneus* DSM 40005. *Proc Natl Acad Sci USA* 2003;100:4316–4321.
- 365 33. **Skyrud W, Liu J, Thankachan D, Cabrera M, Seipke RF, Zhang W.** Biosynthesis  
366 of the 15-membered ring depsipeptide neoantimycin. *ACS Chem Biol* 2018;13:1398–  
367 1406.
- 368 34. **Vior NM, Lacroet R, Chandra G, Dorai-Raj S, Trick M, Truman AW.** Discovery  
369 and Biosynthesis of the Antibiotic Bicyclomycin in Distantly Related Bacterial Classes.  
370 *Appl Environ Microbiol* 2018;e02828–17.
- 371 35. **Kieser TB, Bibb MJ, Buttner MJ, Chater KF, Hopwood DA.** Practical *Streptomyces*  
372 genetics. John Innes Foundation: Norwich;2000.
- 373 36. **Gust B, Challis GL, Fowler K, Kieser T, Chater KF.** PCR-targeted *Streptomyces*  
374 gene replacement identifies a protein domain needed for biosynthesis of the  
375 sesquiterpene soil odor geosmin. *Proc Natl Acad Sci USA* 2003;100:1541–1546.
- 376 37. **Cobb RE, Wang Y, Zhao H.** High-efficiency multiplex genome editing of  
377 *Streptomyces* species using an engineered CRISPR/Cas system. *ACS Synth Biol*.  
378 2015;4:723–728.
- 379 38. **McLean TC, Hoskisson PA, Seipke RF.** Coordinate regulation of antimycin and  
380 candicidin biosynthesis. *mSphere* 2016;1:e00305–16.
